# Supplementary material for: Crystal engineering of a new pharmaceutical polymorph of gallic acid monohydrate: a structural comparative study and chemical computational quantum investigations
Source: Royal Society of Chemistry journal article supplement (doi:10.1039/d3ce00766a), 2023-01-01
Supplement: d3ce00766a1.pdf [file d3ce00766a1.pdf]

**Table S1** Crystallographic data and OH-Orientations for crystal polymorphs I-VII of GAM.

| Identification code   | Polymorph-I      | Polymorph -II          | Polymorph -III                        | Polymorph -IV    | Polymorph -V     | Polymorph -VI    | Polymorph -VII                        |
|-----------------------|------------------|------------------------|---------------------------------------|------------------|------------------|------------------|---------------------------------------|
| ConQuest REFCODE      | KONTIQ           | KONTIQ01               | KONTIQ04                              | KONTIQ05         | KONTIQ06         | KONTIQ07         |                                       |
| Year                  | 2000             | 2001                   | 2011                                  | 2011             | 2013             | 2017             | 2023                                  |
| Temperature (K)       | 293              | 296                    | 100                                   | 298              | 123              | 10               | 100                                   |
| Crystal system        | Monoclinic       | Monoclinic             | Triclinic                             | Monoclinic       | Monoclinic       | Monoclinic       | Triclinic                             |
| Space group           | $P2_1/c$         | $P2/n$                 | P-1                                   | $P2_1/c$         | $P2_1/c$         | $P2_1/c$         | P-1                                   |
| $a$ (Å)               | 5.794(4)         | 14.150(10)             | 7.117(4)                              | 9.790(7)         | 7.607            | 23.768(1)        | 7.1034(6)                             |
| $b$ (Å)               | 4.719(5)         | 3.622(9)               | 7.506(4)                              | 3.609(3)         | 3.641            | 3.543(1)         | 7.4941(6)                             |
| $c$ (Å)               | 28.688(5)        | 15.028(10)             | 30.679(17)                            | 21.583(16)       | 26.792           | 28.756(1)        | 15.556(12)                            |
| $\alpha$ (°)          |                  |                        | 86.557(7)                             |                  |                  |                  | 100.593(3)                            |
| $\beta$ (°)           | 95.08(3)         | 97.52(7)               | 83.814(8)                             | 91.46(1)         | 98.42            | 112.83(1)        | 91.274(3)                             |
| $\gamma$ (°)          |                  |                        | 68.531(6)                             |                  |                  |                  | 111.564(3)                            |
| $V$ (Å <sup>3</sup> ) | 781.303          | 763.580                | 1515.909                              | 762.325          | 734.131          | 2231.714         | 753.39(11)                            |
| $\frac{Z}{Z'}$        | $\frac{4}{1}$    | $\frac{4}{1}$          | $\frac{8}{4}$                         | $\frac{4}{1}$    | $\frac{4}{1}$    | $\frac{12}{3}$   | $\frac{4}{2}$                         |
| OH-Orientations       | $M_1P \bar{M}_2$ | $\bar{M}_1P \bar{M}_2$ | $M_1P M_2$<br>And<br>$M_1P \bar{M}_2$ | $M_1P \bar{M}_2$ | $M_1P \bar{M}_2$ | $M_1P \bar{M}_2$ | $M_1P M_2$<br>And<br>$M_1P \bar{M}_2$ |
